# Supplementary material for: Superior adjuvanticity of the genetically fused D1 domain of Neisseria meningitides Ag473 lipoprotein among three Toll-like receptor ligands
Source: Oxford University Press journal article supplement (doi:10.1042/bsr20193675), 2020-03-23
Supplement: bsr-2019-3675_supp.pdf [file bsr-2019-3675_supp.pdf]

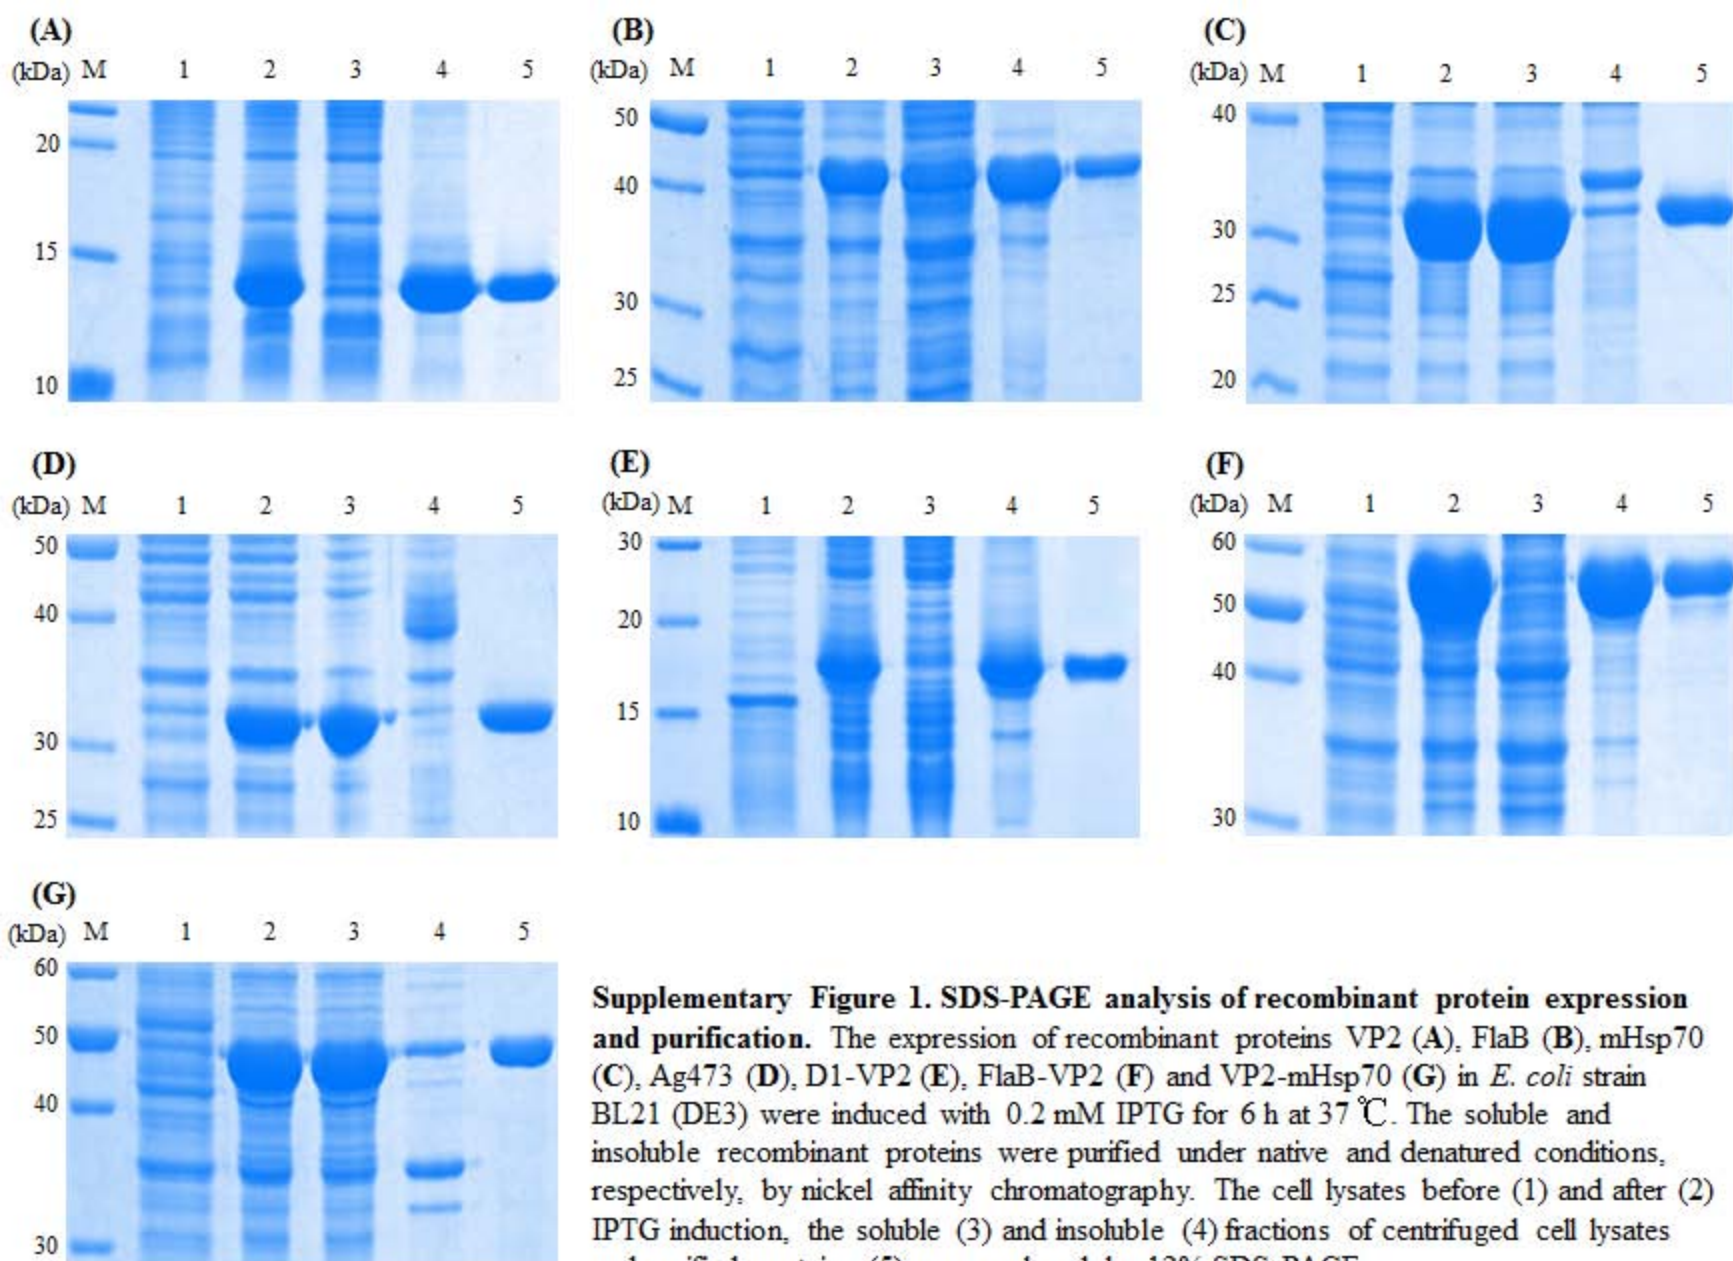

**Supplementary Figure 1. SDS-PAGE analysis of recombinant protein expression and purification.** The expression of recombinant proteins VP2 (A), FlaB (B), mHsp70 (C), Ag473 (D), D1-VP2 (E), FlaB-VP2 (F) and VP2-mHsp70 (G) in *E. coli* strain BL21 (DE3) were induced with 0.2 mM IPTG for 6 h at 37 °C. The soluble and insoluble recombinant proteins were purified under native and denatured conditions, respectively, by nickel affinity chromatography. The cell lysates before (1) and after (2) IPTG induction, the soluble (3) and insoluble (4) fractions of centrifuged cell lysates and purified proteins (5) were analyzed by 12% SDS-PAGE.

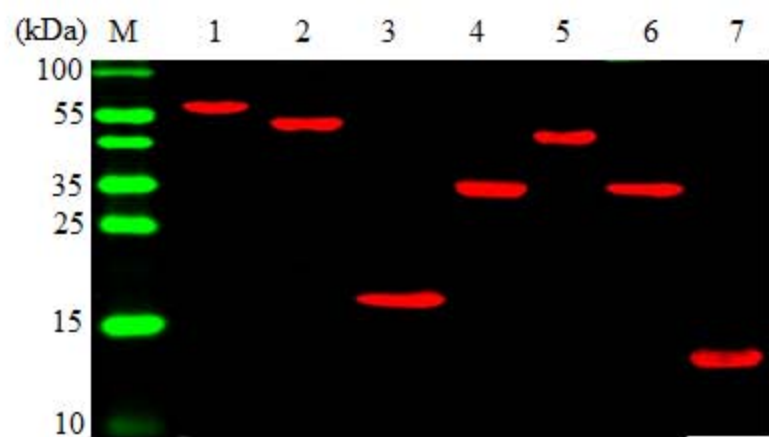

**Supplementary Figure 2.** Western blotting analysis of purified proteins. The purified proteins were separated by 12% SDS-PAGE. After transferred to nitrocellulose membrane, the proteins were identified using anti-His mAb as the first antibody and DyLight 800-labeled goat anti-mouse IgG as the second antibody. 1-7 indicate FlaB-VP2, VP2-mHsp70, D1-VP2, Ag473, FlaB, Hap70, and VP2, respectively.

**(A)**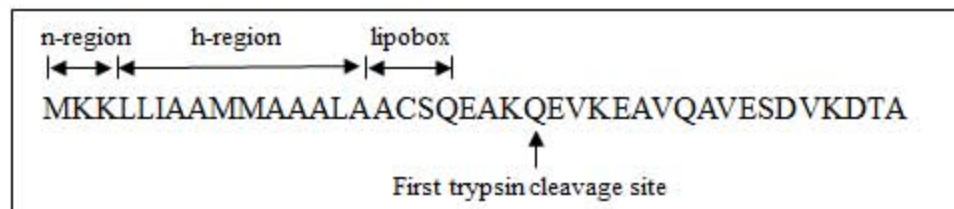**(B)**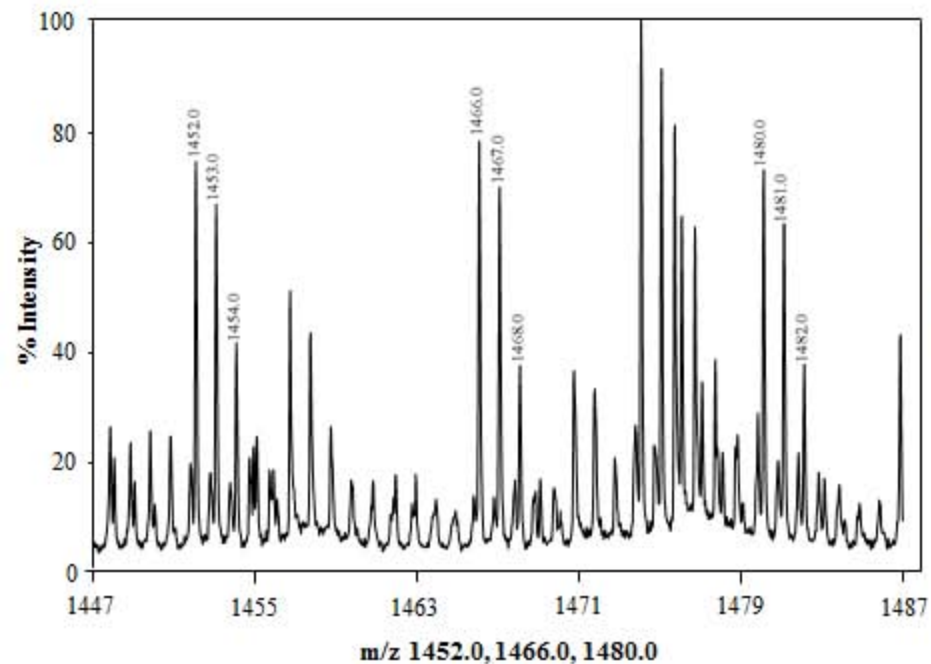**(C)**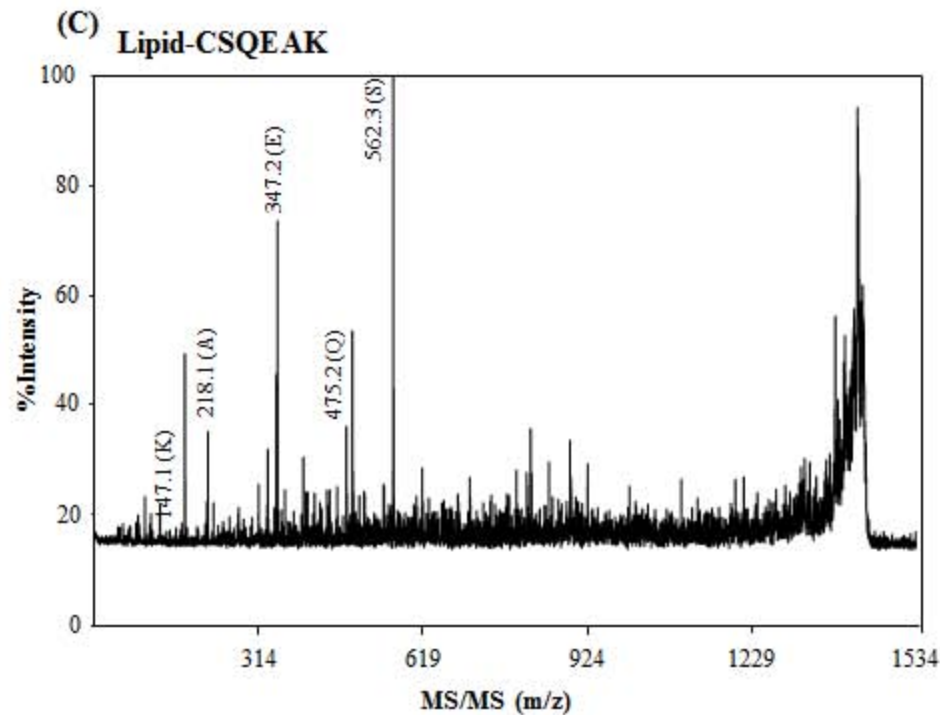

**Supplementary Figure 3. MALDI-TOF/TOF analysis of lipid modification of D1-VP2 fusion protein. (A)** The structure and amino acid sequence of Ag473 D1 domain used for VP2 fusion protein expression. **(B and C)** The N-terminal tryptic segment and the corresponding lipid-modified sequence of D1-VP2 fusion was analyzed by AB5800 MALDI-TOF/TOF mass spectrometry.

**Supplementary Table 1 The PCR primer pairs used in this study**

| Gene     | Primer pair | Sequence (5'→3')                       | Amplicon (bp) | GenBank        |
|----------|-------------|----------------------------------------|---------------|----------------|
| VP2      | Sense       | AT <u>CATATG</u> CTGCTGATGCCGACCACCG   | 366           | FJ848772       |
|          | Antisense   | AT <u>CTCGAG</u> AACGTCGGTCAGTTCAGAC   |               |                |
| Ag473 D1 | Sense       | GCC <u>CATATG</u> AAAAAACTGCTGATCGCTGC | 117           | WP_002220617.1 |
|          | Antisense   | AT <u>GGATCC</u> CAGCGGTGTCTTTAACGTCAG |               |                |
| FlaB     | Sense       | GCC <u>CATATG</u> GCTGTTAACGTTAACACCA  | 1128          | WP_011078329.1 |
|          | Antisense   | GG <u>CTCGAG</u> ACCCAGCAGAGACAGAGCA   |               |                |
| Hsp70    | Sense       | GCC <u>CATATG</u> GGAAGTTAAAGACGTTCTGC | 801bp         | ACE79189.1     |
|          | Antisense   | AT <u>CTCGAG</u> TTTAGCTTCACGACCGTCG   |               |                |

The restriction sites for gene cloning are underlined.

**Supplementary Table 2 The tryptic segments of D1-VP2 fusion protein analyzed by PeptideMass**

| <b>Position</b> | <b>Mass</b> | <b>Peptide sequence</b>                     |
|-----------------|-------------|---------------------------------------------|
| 1-6             | 665.2923    | CSQEAK                                      |
| 7-10            | 503.2824    | QEVK                                        |
| 11-21           | 1174.5950   | EAVQAVESDVK                                 |
| 22-44           | 2330.1431   | DTAGSLLMPTTGPASIPDDTLEK                     |
| 45-48           | 526.3096    | HTLR                                        |
| 49-90           | 4396.1407   | SETSTYNLTVGDTGSGSLIVFFPGFPGSIVGAHYTLQSNGNYK |
| 91-109          | 2248.0525   | FDQMLLTAQNLPASYNCR                          |
| 114-118         | 575.3511    | SLTVR                                       |
| 119-149         | 3139.6157   | SSTLPGGVYALNGTINAVTFQGSLSLTDVK              |
| 150-157         | 847.5400    | ALKPPPPK                                    |
| 159-166         | 1083.4979   | LEHHHHHH                                    |

The amino acid sequence of D1-VP2 fusion protein was analyzed using peptide characterization software PeptideMass ([https://web.expasy.org/peptide\\_mass](https://web.expasy.org/peptide_mass)).
